# Supplementary material for: Waste heat recovery using thermally responsive ionic liquids through TiO2 nanopore and macroscopic membranes
Source: Royal Society of Chemistry journal article supplement (doi:10.1039/d3ee00654a), 2023-01-01
Supplement: d3ee00654a1.pdf [file d3ee00654a1.pdf]

Cite this: DOI: 00.0000/xxxxxxxxxx

## Supplemental Materials: Waste heat recovery using thermally responsive ionic liquids through TiO<sub>2</sub> nanopore and macroscopic membranes

Marc Pascual,<sup>a‡</sup> Nicolas Chapuis,<sup>a‡</sup> Soufiane Abdelghani-Idrissi,<sup>a</sup> Marie-Caroline Jullien,<sup>b</sup> Alessandro Siria,<sup>a</sup> and Lydéric Bocquet<sup>a</sup>

Received Date  
Accepted Date

DOI: 00.0000/xxxxxxxxxx

### 1 Physico-chemical properties of the system

This first section gathers standard measurements made on the water-ionic liquid (IL) mixture of interest.

Fig. S1(a) displays the phase diagram of the water-IL mixture with the IL concentration on the horizontal axis (instead of the IL mass fraction used in Fig. 1(c) of the main text). For a separation temperature of 50°C the concentration ratio of the two separated phases  $c_{max}/c_{min}$  is around 9.

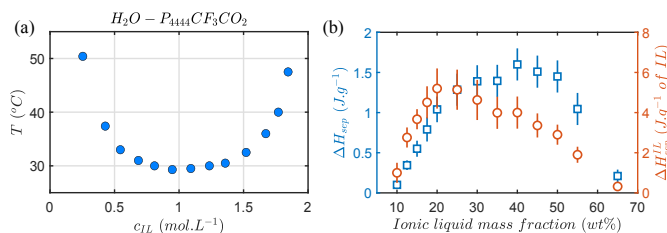

Fig. S 1 (a) Phase diagram of the water-IL mixture as a function of IL concentration. The critical point of this LCST system is at 35 wt% (0.95 M) in IL and 29.5°C. (b) Latent heat absorbed by the mixture upon separation, measured by DSC technique.

The latent heat of separation for the  $P_{4444}CF_3CO_2 - H_2O$  mixture has been measured for different concentration by differential scanning calorimetry (DSC - TA instruments Q20). The latent heat per gram of binary mixture is plotted as blue squares on Fig. S1(b). It shows a maximum around 35-40 wt% in ionic liquid, *i.e.* around the critical point of the mixture. We also plot the latent heat normalised by the mass of IL contained in the mixture as orange circles. We recall here that the latent heat (enthalpy) of phase separation measured here  $\approx 2 \text{ J.g}^{-1}$  is roughly three orders of magnitude lower than the latent heat of vaporization of a liquid-gas system: the LCST mixture requires less energy to be separated than distillation-based waste

heat recovery techniques. This is relevant since the energy harvested on the salinity gradient is proportionnal to the entropy of mixing. However the distillation approach may lead to higher concentration ratio  $c_{max}/c_{min}$  after separation.

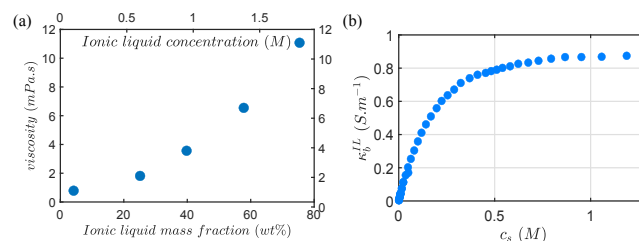

Fig. S 2 (a) Viscosity of the IL-water mixture as a function of IL mass fraction (bottom axis) and IL concentration (top axis), at 25°C. (b) IL-water conductivity versus IL concentration.

Fig. S2(a) presents the viscosity of the binary mixture for five different concentrations, measured at 25°C with a cone-and-plate geometry (Anton-Paar MCR 102). The viscosifying effect of the ionic liquid is to be considered if one wishes to minimize charge losses in the fluidic system. The bulk conductivity of the system, measured with a conductimeter (Hanna Instruments HI2315), is shown on Fig. S2(b). It increases linearly with the salt concentration until 0.1 M, then it flattens and even decreases slightly at higher IL concentrations. This behavior can be linked to the weak electrolyte behavior of the ionic liquid, which is known to form aggregates above 0.1 M.

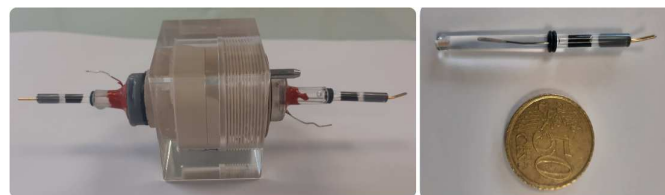

Fig. S 3 Photo of the fluidic cell with the two low profile reference electrodes inserted. On the right is presented one of these electrodes with a 0.50 euro coin for scale.

<sup>a</sup> Laboratoire de Physique de l'Ecole Normale Supérieure, ENS, Université PSL, CNRS, Sorbonne Université, F-75005 Paris, France

<sup>b</sup> Université Rennes 1, CNRS, IPR (Institut de Physique de Rennes) - UMR 6251, F-35000 Rennes, France

‡ These authors contributed equally to this work

Fig. S3 shows on the left a picture of the homemade fluidic cell used for the measurements with the nanopores and on the right a close-up on a small reference electrode used in this study. The nanopore is sandwiched in the middle of the cell with two reservoirs of liquid on each side. In each reservoir is inserted a homemade Ag/AgCl electrode (shiny wire 0.5 mm thick) and a commercial Ag/AgCl reference electrode (60 mm long and 3.5 mm thick, PineResearch - RRPEAGCL2).

The homemade Ag/AgCl wires are used to impose a potential difference and collect the associated ionic currents. The commercial reference electrodes are used to screen the electrode potential of the homemade Ag/AgCl electrodes before and after each measurement.

Although we do not expect the ionic liquid to react faradically with Ag/AgCl electrodes in the  $\pm 0.1$  V window, the choice of Ag/AgCl instead of Pt electrodes is justified by the greater stability and reproducibility of their electrode potential.

## 2 Measurements with KCl for an individual nanopore

Once the nanopores have been coated with  $TiO_2$  and annealed, conductance and diffusio-osmotic measurements are carried with  $KCl$  electrolyte before moving to IL-water mixtures in order to check the nanopores consistency.

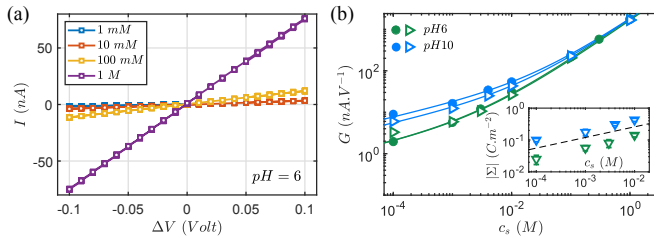

Fig. S 4 (a) Current versus voltage curves for an individual  $TiO_2$  nanopore at different concentrations in  $KCl$ , pH 6. The pore length is 500 nm and its diameter is 200 nm. (b) Experimental conductance values for two  $TiO_2$  nanopores (triangles and circles) filled with  $KCl$  at pH=6 (green) and 11 (blue). The solid lines are fits from equation 1 in main text. (inset) Surface charge  $\Sigma$  versus the salt concentration.

$I - V$  curves of a single  $TiO_2$  nanopore filled with  $KCl$  at pH 6 are plotted on Fig. S4(a). The conductance values derived from the slope of these curves are gathered on Fig. S4(b). As expected from a charged nanopore the conductance  $G$  shows a non-linear dependence at lower concentrations and the increase of  $G$  with the pH proves the pore negative charge. The inset on the bottom right shows the surface charge in  $C.m^{-2}$  as a function of the concentration, deduced from the fit of the conductance curves using equation 1 in the main text. We recover a  $1/3$  slope which is characteristic of the  $\Sigma \sim c_s^{1/3}$  scaling.

We also check the diffusio-osmotic currents in the nanopore with different  $KCl$  concentration ratio. Fig. S5(a) shows an  $I - V$  curve obtained with 0.003  $M$  and 0.1  $M$  in each reservoirs, at pH 11. The current shows a slight rectification and an offset of 19 nA at  $\Delta V = 0$ , this offset being the sum of the Nernst current (with  $c_{max}/c_{min} = 33.3$  ratio the Nernst potential is  $\approx 80$  mV) and the diffusio-osmotic current  $I_{DO}$ .

The inset gives the electrode potential of the homemade Ag/AgCl wires immersed in each reservoir versus the Ag/AgCl saturated reference electrode during the experiment (we switch from closed to open circuit to perform this measure): we recover the expected values of 98 mV at 0.1  $M$  and 180 mV at 0.003  $M$  versus the Ag/AgCl reference electrode as predicted by the Nernst formula, yielding a Nernst potential across the nanopore of 82 mV here.

The subtraction of the Nernst currents allows to isolate the diffusio-osmotic contribution  $I_{DO}$  to the current at  $\Delta V = 0$ , the former is plot-

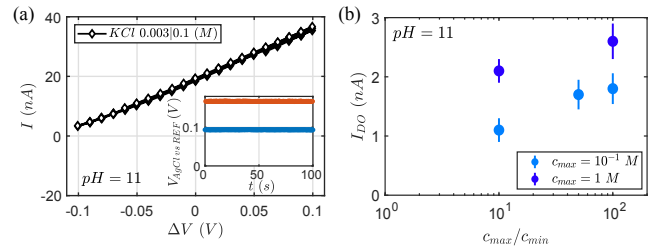

Fig. S 5 (a)  $I - V$  curve for a  $TiO_2$  nanopore in a gradient of  $KCl$  at pH 11. (inset)  $Ag/AgCl$  electrode potential versus the reference electrode, for both reservoirs (blue is 0.1  $M$ ; orange is 0.003  $M$ ). (b) Diffusio-osmotic current versus the concentration ratio  $c_{max}/c_{min}$  for a  $TiO_2$  coated nanopore at pH 11.

ted in Fig. S5(b). From equation 4 of the main text we can derive  $I_{DO} \sim 2\pi R \Sigma D_{DO} \nabla c_{inf} / c_{inf}$ . Knowing that with  $KCl$  salt we have  $\Sigma = ac_s^\gamma$ , we obtain:

$$I_{DO} \approx \frac{2\pi R D_{DO}}{\gamma L} a c_{max}^\gamma (1 - (c_{min}/c_{max})^\gamma) \quad (1)$$

with  $\gamma = 1/3$ . We recover the  $c_{max}^{1/3}$  scaling of the current and the increase with  $c_{max}/c_{min}$ .

Once such results have been obtained for a nanopore, it is rinsed with water and the measurements with IL electrolytes are performed (see Fig. 2-5 of the main text).

Another control experiment to probe the nanopore surface charge filled with  $KCl$  electrolyte is the streaming current measurement: under a pressure drop across the nanopore we record an ionic current induced by the net charge flow in the Debye layers. On Fig. S6(a) we see a linear increase of the streaming current  $I_{str}$  as a function of the pressure drop  $\Delta P$  (dark squares).

In order to get a better understanding of the nanopore surface charge behavior when it is filled with IL solutions, the same measurements were conducted with the IL-water mixtures for a wide range of concentration and pH, see Fig. S6(a-c). Firstly, the streaming current sign does not change when pH varies from 4 to 12, indicating a steady negative surface charge in this pH range. Secondly, the current intensity first increases with the concentration then decreases at higher salinity; a classical behavior observed in streaming currents measurements. We conclude that no surface charge inversion occurs when the IL concentration is increased. The zeta potential  $\zeta$  of the nanopore can be extracted from these data using the following relation:

$$I_{str} = \frac{\pi R^2 \zeta \epsilon_0 \epsilon}{\eta L} \Delta P \quad (2)$$

with  $R$  the pore radius,  $L$  the pore length,  $\epsilon_0$  the permittivity of vacuum,  $\epsilon$  the relative permittivity of the liquid,  $\eta$  the viscosity and  $\Delta P$  the pressure drop applied. The dependence of  $\zeta$  on the salt concentration is plotted on Fig. 3(a) in the main text.

## 3 Characterisation of $TiO_2$ membrane and measurement with $KCl$

The macroscopic  $TiO_2$  membrane from Fraunhofer IKTS consists of an asymmetric structure. The support (thickness of 1 mm) gathers several intermediate porous layers made on  $TiO_2$  with tortuous pores of  $5\mu m$  in average size. These large grains can be seen in the lower part of Fig. S7(d)

We characterize the transport under voltage and concentration gradient through the membrane first with salt  $KCl$ .  $I - V$  curves at  $pH = 7$  are plotted on Fig. S8(a) for different  $[KCl]$  and we can easily recover the linear response of the current produced by an electric potential drop across the membrane. This allows us to extract the conductance value for each concentration, which is plotted in Fig. S8(b) together with the conduc-

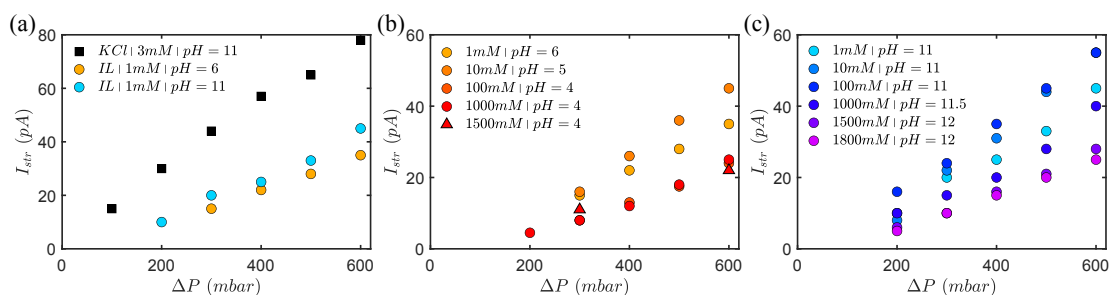

Fig. S 6 (a) Streaming current intensity versus applied pressure for KCl and IL electrolytes in a  $TiO_2$  nanopore. (b)&(c) Similar measurements for IL solutions at pH 5 and 11.

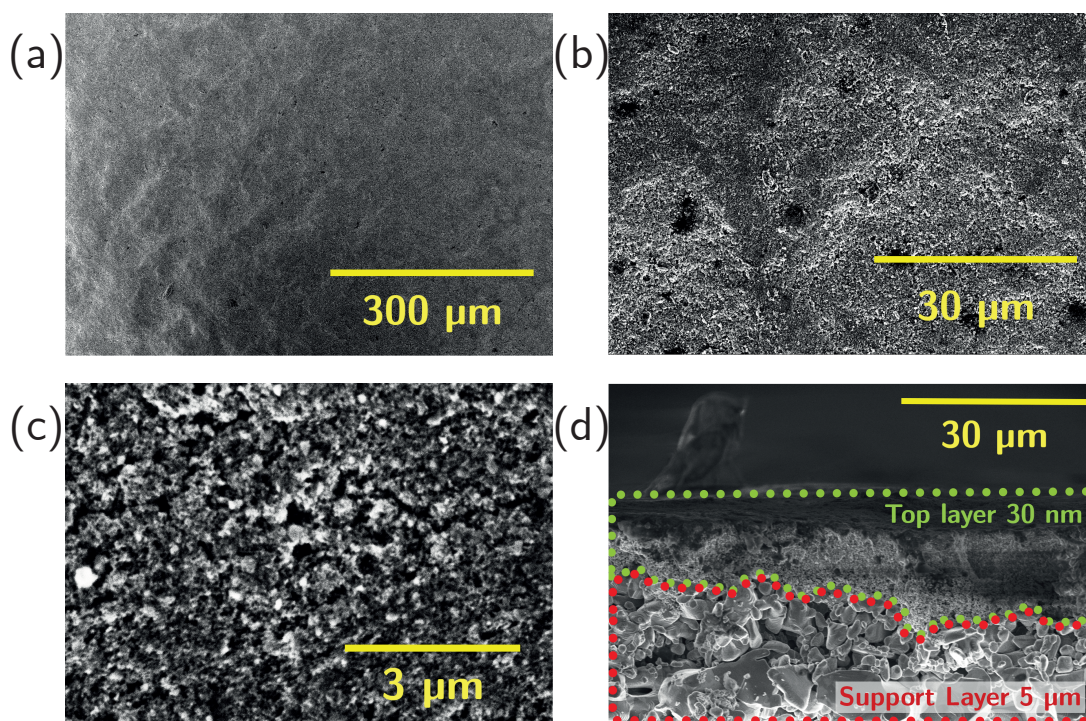

Fig. S 7 SEM images of the macroscopic  $TiO_2$  membrane. (a) Unzoomed view of the surface which shows that on average there are few surface defects. Yellow scale bar corresponds to  $300 \mu m$ . (b) Intermediate zoomed out view of the surface showing small defects (large black dots) and holes (very small black dots). Yellow scale bar corresponds to  $30 \mu m$  (c) Close-up view of the surface showing  $TiO_2$  holes (black dots). The average size varies between  $30$  and  $50 nm$ . The surface density varies between  $50$  and  $100 holes/\mu m^2$ . Yellow scale bar corresponds to  $3 \mu m$  (d) Cross-section of the membrane surface. Inside the green dots is the upper layer with a thickness varying between  $5$  and  $10 \mu m$  which is pierced with  $30 nm$  holes as seen in view (c). Inside the red dots are the intermediate granular  $TiO_2$  layers which form paths between the grains and have a size of about  $5 \mu m$ . Yellow scale bar corresponds to  $30 \mu m$ .

tance of the cell without the membrane (dotted lines in dark red). A plateau is found at low concentrations, which is consistent with a surface ion transport phenomenon inside the pores. Since we have a macroscopic membrane, in order to extract an order of magnitude of the surface charge inside the pores, we propose the simplest model consisting in considering the membrane as multiple pores gathered in parallel :  $G_{\text{membrane}} = N * G_{\text{pores}}(\Sigma)$ . The fit gives  $N \approx 4000 - 10000$  pores that corresponds to a surface density of about about  $40 - 100$  pores/ $\mu\text{m}^2$  and which is in line with SEM images Fig. S7. This model does not take into account hypothetical interactions that might exist due to the overlapping effects of pore entrance which could affect the pore number exponent  $N^\beta$  with  $\beta$  which could be  $\neq 1$ . This does not prevent the surface charge from being estimated, since it governs the flatness of the curve at low concentrations and not the vertical offset. Surface charge against  $[KCl]$  is plotted in Fig. S8(c) which are an order of magnitude lower than those evaluated for a single nanopore of  $TiO_2$  Fig. S4. However, we find the same concentration dependency scale law of  $1/3$  like the one for the nanopores.

In a second step, we studied ionic transport under the effect of a salt concentration gradient on both sides of the membrane. For different concentration gradients from  $10$  to  $10^4$  we measured the I-V characteristics. The current at zero electrical polarisation  $I_{\text{offset}(V=0)}$  is the sum of the Nernst current generated by the chemical potential difference of the electrodes due to the different concentrations  $I_{\text{Nernst}}$  and the diffusio-osmotic current  $I_{\text{diffusio-osmotic}}$ . The offset and diffusio-osmotic currents are plotted in Fig. S9(b) and a diffusio-osmotic current of opposite sign to the offset current is observed.

To measure the Nernst potential of Ag/AgCl electrodes in ionic liquids as a function of their concentration, which is not tabulated, we immerse two Ag/AgCl electrodes that constitute the working electrode

and the counter electrode as well as a saturated Ag/AgCl reference electrode (PINEresearch LowProfile Reference Electrode). We measure the potential of the working electrode versus the reference electrode in Open Circuit Voltage for each concentration. These measurements are shown in Fig. S10(a). In a second step, we calculate the potential difference corresponding to the gradient we will use, and this gives us the Nernst contribution of the electrodes to the I-V curve measurements shown in Fig. S6 (b) of the main text. Multiplying this by the associated conductance, we have the corresponding Nernst current, and subtracting this from the value of the current for zero potential difference under salt gradient to obtain the diffusio-osmotic current shown in Fig. 6 (b) of the main text.

## 4 Measurements with $P_{4448}Cl - H_2O$ binary mixture

In parallel to the experiments with  $P_{4444}CF_3CO_2 - H_2O$  mixtures, we did similar measurements with another phosphonium-based IL:  $P_{4448}Cl$  (this IL does not show an LCST with water but a blend with a more hydrophobic phosphonium IL can lead to the LCST behavior). On Fig. S11(a) are plotted the current intensities  $I_0$  measured at  $\Delta V = 0$  for various concentration ratio of  $P_{4448}Cl$  and two  $pH$  (modulated with  $HCl$  and  $P_{4448}OH$ ). As this current is the sum of the Nernst current and the diffusio-osmotic current  $I_{DO}$ , the later contribution is isolated using the same reference electrodes as above and plotted on Fig. S11(b). Again, surprisingly, the sign of  $I_{DO}$  is negative, underpinning the peculiar interaction of the bulky phosphonium cations with the nanopore surface. There is no great difference observed between the two  $pH$  and we notice also that  $I_{DO}$  intensity is 3 to 4 times smaller than the intensity collected with  $KCl$  solutions for a similar concentration range (see Fig. S5(b)).

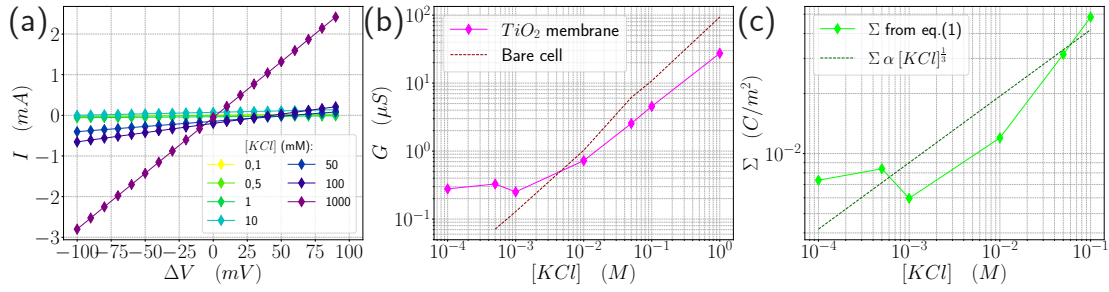

Fig. S 8 (a) I-V curves of the  $TiO_2$  membrane for salt concentration  $[KCl]$  varying from  $10^{-4} M$  to  $1 M$  at  $pH = 7$ . (b) In purple, conductance  $G = I/\Delta V$  extracted from (a) and plotted versus the salt concentration  $[KCl]$ . We note a plateau at the lowest concentration. In darkred dashedlines the conductance of the bare cell without membrane. (C) In green, extracted values of the surface charge obtained by fitting  $G_{membrane} = N * G_{pores}(\Sigma)$  with  $G_{pores}$  following eq. (1). In darkgreen dashed lines is plotted the model where the surface charge depends on the salt concentration with a exponent  $1/3$ .

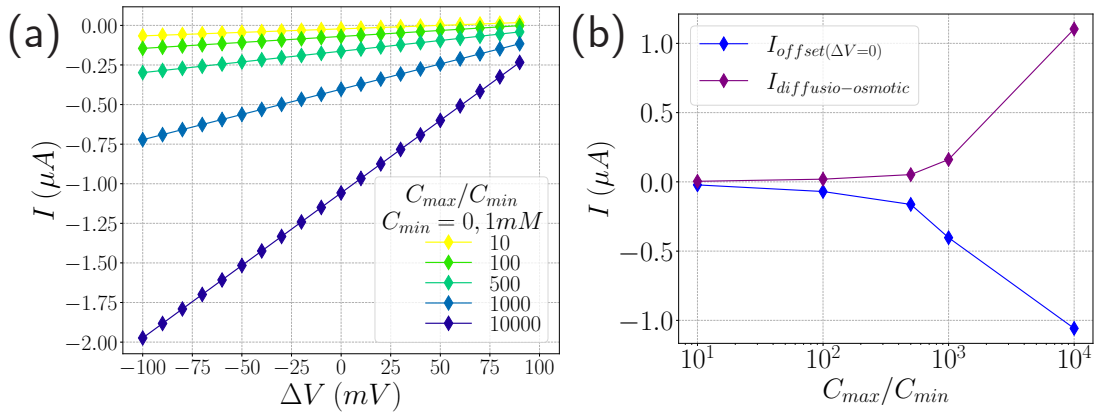

Fig. S 9 (a) I-V curves of the  $TiO_2$  membrane for salt concentration gradient  $[KCl]$  varying from  $10$  to  $10^{-4}$  at  $pH = 7$ . (b) In blue, the current  $I_{offset}(V=0)$  is plotted for zero electrical bias (which corresponds to the y-intercept of the I-V characteristics in Fig. S9 (a)). Purple is the diffusio-osmotic current  $I_{diffusio-osmotic}$  obtained by subtracting the Nernst contribution from the zero electric bias current.

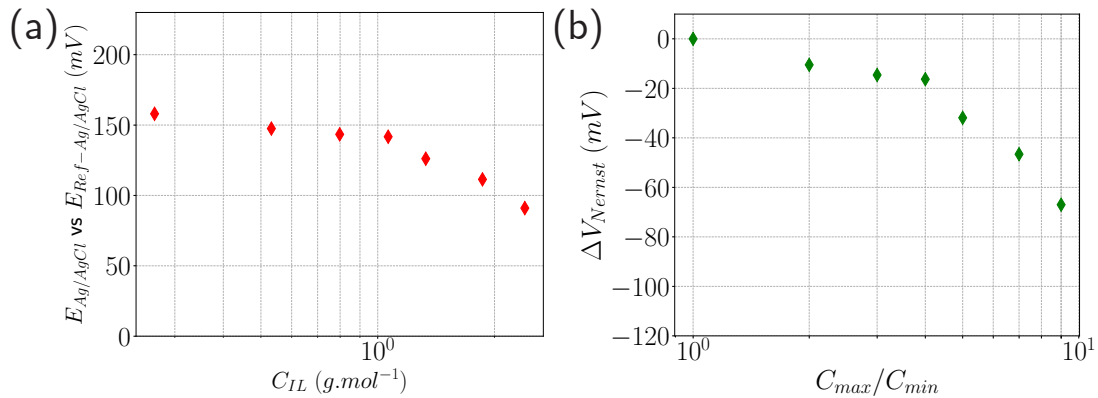

Fig. S 10 Potential of an Ag/AgCl electrode immersed in ionic liquid for various concentrations compared to a reference electrode. (b) Potential difference between two Ag/AgCl electrodes immersed in two different concentrations as a function of this gradient.

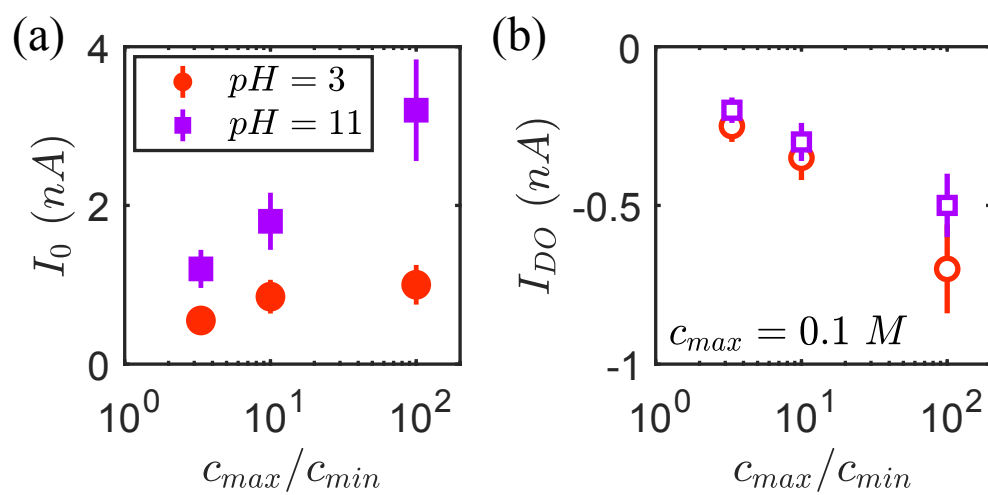

Fig. S 11 (a) Current intensity at  $\Delta V = 0$  versus  $c_{max}/c_{min}$  for a  $TiO_2$  nanopore submitted to gradients of  $P_{4448}Cl$  solutions, at pH 6 and 11. (b) Diffusio-osmotic currents deduced from the values of (a) after subtracting the Nernst contribution.
